# Supplementary material for: Clinical application of sparse canonical correlation analysis to detect genetic associations with cortical thickness in Alzheimer’s disease
Source: Front Neurosci. 2024 Sep 24;18:1428900. doi: 10.3389/fnins.2024.1428900 (PMC11458562; doi:10.3389/fnins.2024.1428900)
Supplement: Supplementary file 2 [file Table_1.XLSX]

## Sheet: Table S1
Supplementary Tables S1. 344 Filtered SNPs
CHR	BP	SNP
1	193608318	rs10921394
1	207789269	rs11576522
1	163090553	rs11807823
1	244577894	rs12032765
1	98928420	rs12045149
1	41083947	rs12067173
1	193648828	rs12138394
1	27397604	rs12410656
1	193702274	rs1328194
1	207886150	rs1359147
1	207747296	rs1752684
1	163183005	rs2036701
1	207660071	rs2182911
1	207868972	rs58817628
1	207395031	rs6540875
1	246281527	rs6686745
1	207750568	rs679515
1	68047141	rs75121373
1	193634651	rs7550917
1	246840434	rs9426209
2	53094982	rs10208858
2	127776054	rs1077666
2	127844161	rs10929006
2	127839474	rs11682128
2	127839534	rs11690153
2	127886416	rs12617835
2	1875551	rs12714315
2	220703292	rs13000695
2	53258713	rs17044055
2	53097750	rs2356681
2	234068476	rs35349669
2	127846505	rs35832505
2	127891427	rs4663105
2	127894098	rs56368748
2	37464230	rs61208496
2	127868435	rs6743470
2	52865816	rs6744142
2	71600924	rs6760748
2	127885651	rs719054
2	127894484	rs730482
2	127893897	rs745717
2	127889637	rs7561528
2	233981399	rs7569598
2	140480499	rs77434175
2	50875879	rs858952
3	31796641	rs1344003
3	128296506	rs3829729
3	128310107	rs62273237
3	105085111	rs7647531
4	125864319	rs10022344
4	11675477	rs13140302
4	11630049	rs6448799
4	190764527	rs6553385
4	40322237	rs75935798
4	40305065	rs76565346
4	11723235	rs7657553
4	40354721	rs7669053
5	35081411	rs113983456
5	71015451	rs11575893
5	110592550	rs1428037
5	139532538	rs155942
5	14673696	rs16903631
5	126693758	rs17165037
5	139543091	rs175086
5	152958550	rs17519383
5	141883061	rs17612068
5	88223420	rs190982
5	118136826	rs1949100
5	143728206	rs244524
5	139710507	rs2878896
5	8906295	rs2963339
5	176984163	rs335472
5	114976117	rs56104517
5	152921742	rs62382829
5	139396172	rs62383917
5	14727041	rs73048835
5	160383719	rs9968676
6	32669833	rs115675626
6	47348061	rs12197270
6	47383890	rs13207334
6	27883201	rs1497526
6	32564681	rs17191234
6	32570401	rs2454138
6	13309895	rs2496140
6	32565169	rs28366359
6	32572278	rs28707773
6	32608478	rs34141382
6	32560477	rs34415150
6	32561334	rs35265698
6	32576064	rs482044
6	32577497	rs536810
6	32573415	rs601945
6	13300368	rs641293
6	47362214	rs6458567
6	32634264	rs72844399
6	47318885	rs7761581
6	27620034	rs77988388
6	27863828	rs78467594
6	67674682	rs80225070
6	32570717	rs9270850
6	32574602	rs9271006
6	32606885	rs9272545
6	106601355	rs9372118
6	47432637	rs9381563
6	47662484	rs9381599
6	47392543	rs9395255
7	50319618	rs1026423
7	37619144	rs10270490
7	32531129	rs10272283
7	100804430	rs1048365
7	25567855	rs10807828
7	143099133	rs10808026
7	143088526	rs1131885
7	112510137	rs11768787
7	143121720	rs11769980
7	143110762	rs11771145
7	143117919	rs12540656
7	143105830	rs12703524
7	37697015	rs2597284
7	37841534	rs2718058
7	37875558	rs2722237
7	37867036	rs2722334
7	9163327	rs293188
7	99728790	rs35991721
7	143104331	rs3935067
7	137905563	rs4031449
7	37882632	rs59415886
7	143123975	rs62472730
7	100079857	rs6971558
7	125556493	rs6972194
7	37612345	rs6978014
7	26272643	rs73281586
7	99932049	rs7384878
7	100835885	rs7780766
7	143108158	rs7810606
7	143130078	rs9640384
7	143132183	rs9640386
8	23938803	rs10097415
8	27217763	rs10097651
8	27212276	rs10109834
8	2931339	rs11774290
8	95995701	rs13276936
8	27316117	rs2271920
8	27330813	rs2565045
8	27330286	rs2741341
8	27330096	rs2741342
8	27195121	rs28834970
8	27422491	rs59953408
8	2903589	rs72621189
8	31121769	rs7812391
8	27430506	rs7831810
8	27462481	rs7982
9	107630433	rs10991386
9	137120023	rs11185676
9	135914352	rs689266
10	59941791	rs10509088
10	124120457	rs10510109
10	62517763	rs10761556
10	98137255	rs11188740
10	11721119	rs11257242
10	43401716	rs11528477
10	59899498	rs12571971
10	59921363	rs17709286
10	89787275	rs2049814
10	132983821	rs2397752
10	60671677	rs3910869
10	124115881	rs7089084
10	124123270	rs7097844
10	124122373	rs7916835
10	124120559	rs984668
11	47391948	rs10437655
11	85867875	rs10792832
11	47422861	rs10838703
11	70440051	rs10899223
11	973542	rs10902256
11	121435587	rs11218343
11	59848232	rs1151105
11	60090532	rs11559565
11	85494375	rs116468712
11	121469981	rs11820853
11	85655105	rs1237230
11	69269455	rs12421128
11	47932666	rs12802244
11	59916253	rs1315491
11	60047410	rs1426248
11	60102790	rs1443250
11	60028917	rs1530915
11	60021948	rs1582763
11	59927039	rs17529983
11	76434820	rs1893306
11	19926420	rs2028606
11	60045677	rs2044982
11	47370957	rs2071305
11	47268310	rs35677603
11	85873779	rs3901732
11	47907641	rs4752801
11	60099225	rs4939338
11	59852569	rs554311
11	59952316	rs55661415
11	59877850	rs562028
11	121512901	rs573605
11	66874619	rs57478329
11	85652826	rs598561
11	15328898	rs61878035
11	47929846	rs6485795
11	47568074	rs66749409
11	85843197	rs67598967
11	47676170	rs7107356
11	60002935	rs718376
11	926870	rs7479145
11	121517613	rs76367405
11	47301225	rs7944419
11	121423640	rs7946599
11	59923508	rs983392
12	2751312	rs11613210
12	89797700	rs34196696
12	7155998	rs7131869
12	7165114	rs7311672
12	89813307	rs770369
12	89816443	rs770377
13	27960888	rs1218788
13	108670406	rs2391610
13	27958036	rs2780346
13	108672385	rs9520713
14	75376036	rs10131976
14	92926952	rs10498633
14	92938415	rs11160071
14	53298277	rs12586707
14	92938855	rs12590654
14	34446715	rs1680666
14	75103298	rs17101650
14	53400629	rs17125944
14	88823655	rs1955598
14	35247540	rs28690092
14	92930445	rs61977311
14	89220391	rs61983300
14	75365729	rs732765
14	92316755	rs8005894
14	92936690	rs8008388
15	64345949	rs113294283
15	93600976	rs17526269
15	51019812	rs17646025
15	63145130	rs72751481
15	82444437	rs905450
16	70700214	rs11639579
16	70702758	rs12597717
16	11215661	rs1861199
16	21021657	rs3103810
16	11213021	rs35441874
16	11031156	rs4780338
16	11064617	rs7203209
16	70718843	rs77322829
16	70697414	rs78335918
17	47324485	rs11079866
17	4961538	rs112466593
17	5261743	rs112918260
17	5138980	rs113260531
17	4823657	rs113426708
17	76553636	rs12450340
17	10021341	rs17687054
17	4839033	rs2243100
17	56409089	rs2632516
17	4974431	rs72828889
17	5116379	rs77972827
17	4763551	rs8078173
18	8970615	rs10853370
18	5955083	rs3745091
18	32549835	rs614793
18	29088958	rs8093731
19	45346768	rs1001611
19	45253491	rs10401176
19	45733897	rs10402739
19	45341948	rs10407439
19	18542701	rs10408290
19	45962799	rs10415949
19	45657486	rs10421247
19	45651237	rs113321260
19	45322744	rs1135062
19	45147340	rs11540084
19	45490192	rs11672748
19	45220896	rs11881756
19	45547583	rs12327831
19	45605308	rs12461065
19	45522181	rs12981350
19	45426792	rs141622900
19	45486687	rs143668237
19	45231821	rs1551891
19	45395266	rs157580
19	45095837	rs1661200
19	46345886	rs16980051
19	45631816	rs17643262
19	46234155	rs17878252
19	45544351	rs1968449
19	46269076	rs2014576
19	45500712	rs2376866
19	51728641	rs2455069
19	45389174	rs283813
19	45324138	rs28399637
19	45204322	rs2919847
19	45241638	rs2927437
19	45242740	rs2927439
19	45198936	rs2965162
19	45202052	rs2965164
19	45343664	rs2972562
19	46200103	rs34399924
19	45733201	rs346773
19	45383139	rs35879138
19	46201213	rs36040835
19	45381917	rs3729640
19	1051214	rs3752240
19	1039444	rs3795065
19	51727962	rs3865444
19	1062164	rs4147920
19	1063443	rs4147929
19	1043864	rs4622634
19	45247627	rs4803750
19	45357291	rs4803763
19	45708408	rs595290
19	45877788	rs62112767
19	45734751	rs62118504
19	39600126	rs62120485
19	45382034	rs6859
19	1037941	rs72618590
19	1050130	rs7408475
19	1028149	rs75364577
19	1089025	rs75639405
19	45403858	rs760136
19	45240189	rs77775146
19	45691279	rs78144257
19	45221767	rs79638902
19	45215805	rs79745266
19	45584692	rs8100183
19	45367777	rs8105340
19	45325309	rs8112196
19	45311747	rs8113171
19	45325738	rs8113311
19	45057443	rs957304
20	52551884	rs16998572
20	54998544	rs6014724
20	7127831	rs6054767
20	48501606	rs645544
21	37675683	rs8132672
22	41598933	rs136402
22	21982892	rs2298428

## Sheet: Table S2
Supplementary Tables S2. Results of the association analysis of SNPs with the diagnostic group
Chr	SNP	Base pair	Odds ratio	P-value
1	rs12067173	41083947	0.6896	0.08149
1	rs7550917	193634651	0.9889	0.9346
1	rs1328194	193702274	0.9169	0.4401
2	rs858952	50875879	0.8474	0.4106
2	rs6743470	127868435	1.146	0.3399
5	rs190982	88223420	1.095	0.5469
5	rs1949100	118136826	1.01	0.928
5	rs17612068	141883061	1.193	0.5466
6	rs77988388	27620034	1.022	0.8901
6	rs9270850	32570717	1.102	0.492
6	rs34141382	32608478	0.8941	0.3725
6	rs115675626	32669833	1.308	0.1876
7	rs73281586	26272643	1.468	0.04225
8	rs2271920	27316117	0.9735	0.8592
19	rs4622634	1043864	0.9688	0.7696
19	rs6859	45382034	1.623	7.992e-06
19	rs35879138	45383139	1.971	4.992e-07
19	rs157580	45395266	0.5846	5.562e-07
19	rs141622900	45426792	0.4078	0.0008044
19	rs17878252	46234155	0.9102	0.4988

## Sheet: Table S3
Supplementary Tables S3.Top 10 SNPs and canonical weights in SCCA with total samples
SNP	CHR	BP	Gene	Weight
rs2878896	5	139710507	HBEGF (nearest)	-0.17542
rs73281586	7	26272643	CBX3 (nearest)	-0.163569
rs7479145	11	926870	AP2A2	0.153856
rs1955598	14	88823655	SPATA7 (nearest)	0.146605
rs3829729	3	128296506	C3orf27 (nearest)	-0.139878
rs12571971	10	59899498	RP11-123G9.1 (nearest)	0.137868
rs115675626	6	32669833	MTCO3P1 (nearest)	0.133879
rs984668	10	124120559	PLEKHA1 (nearest)	0.128959
rs562028	11	59877850	MS4A2 (nearest)	-0.127601
rs760136	19	45403858	TOMM40	0.124882

## Sheet: Table S4
Supplementary Tables S4. Correlation coefficients (r) of predication models for AD biomarkers
	Cortical thickness	MMSE	CDR-SB
Model 1	0.420	0.385	0.290
Model 2 (model 1 + top 10 SNPs)	0.463*†	0.407*	0.322*
Model 3 (model 1 +10 random SNPs)	0.428	0.398	0.317
Note: model 1 used age, sex, APOE ε4, and, if appropriate, ICV or education. Asterisks (*) represents the significant results when comparing the two correlation coefficients (model 1 and model 2) and dagger (†) represents the significant results when comparing the two correlation coefficients (model 2 and model 3). Statistical tests were performed to compare the two correlation coefficients using…

## Sheet: Table S5
Supplementary Tables S5. Top 10 enriched pathway with selected SNPs
Term	Ontology	OR	P-value
Clathrin-Coated Endocytic Vesicle Membrane	CC	75.4697	0.000503616
Clathrin-Coated Endocytic Vesicle	CC	59.9608	0.000785679
Clathrin-Coated Vesicle Membrane	CC	56.5398	0.000880239
Regulation Of Protein Kinase B Signaling	BP	37.0448	0.00199302
Protein Localization To Non-Motile Cilium	BP	555.167	0.00249771
Endocytic Vesicle Membrane	CC	31.5812	0.00271037
Protein Localization To Ciliary Transition Zone	BP	370.074	0.00349522
AP-2 Adaptor Complex	CC	317.19	0.00399365
Clathrin Coat Of Endocytic Vesicle	CC	317.19	0.00399365
Endocytic Vesicle	CC	25.5103	0.00408298
